# Supplementary material for: Physical Activity Dose and Depression in a Cohort of Older Adults in The Irish Longitudinal Study on Ageing
Source: PubMed Central journal article supplement (PMC10334250; doi:10.1001/jamanetworkopen.2023.22489), 2023-07-10
Supplement: jamanetwopen-e2322489-s001.pdf [file jamanetwopen-e2322489-s001.pdf]

## Supplementary Online Content

Laird E, Rasmussen CL, Kenny RA, Herring MP. Physical activity dose and depression in a cohort of older adults in The Irish Longitudinal Study on Ageing. *JAMA Netw Open*. 2023;6(7):e2322489. doi:10.1001/jamanetworkopen.2023.22489

**eFigure.** The Major Depression Status of TILDA Participants (n = 4016) Across Data Collection Waves 1-5

**eTable 1.** Adjusted Incident Rate Ratios for Associations of All Included Variables With Depressive Symptoms and Adjusted Odds Ratios for Associations With Major Depression Status

**eTable 2.** Adjusted Incident Rate Ratios for Associations of All Included Variables With Depressive Symptoms in Those With and Without Chronic Disease

**eTable 3.** Adjusted Odds Ratios for All Included Variables With Major Depression Status in Those With and Without Chronic Disease

This supplementary material has been provided by the authors to give readers additional information about their work.

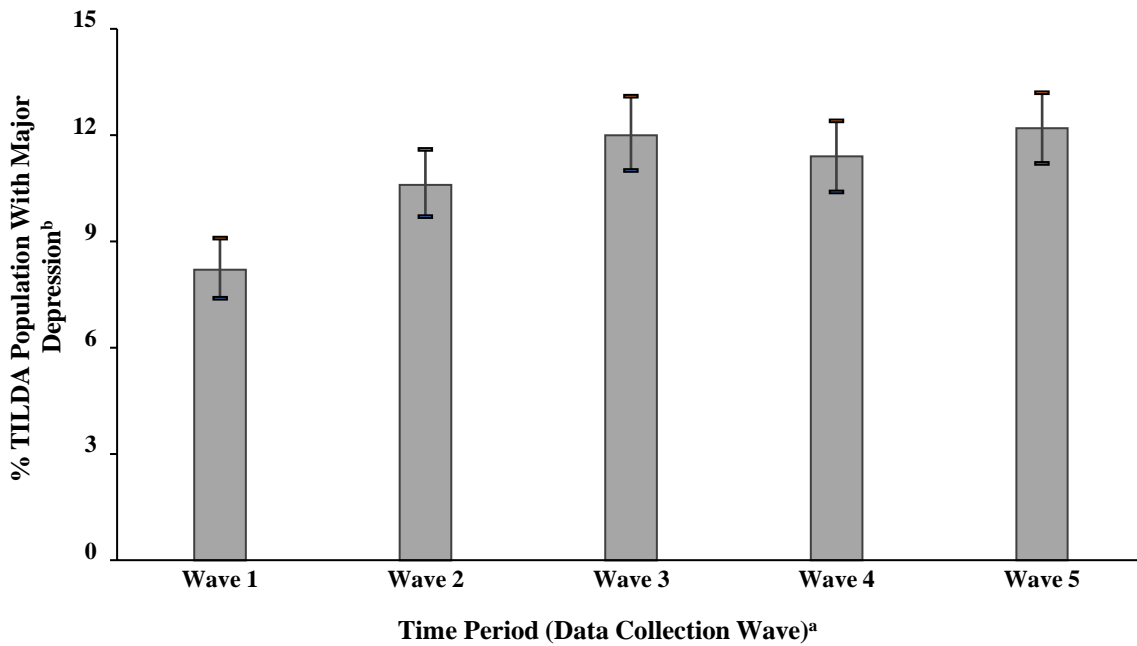

**eFigure.** The Major Depression Status Of TILDA Participants (n = 4016) Across Data Collection Waves 1-5.

<sup>a</sup>Values at each Wave indicate mean percentage (%) with 95% Confidence Intervals

<sup>b</sup>At all Waves, depressive symptoms were measured using the short-form of Centre for Epidemiological Studies Depression (CES-D), with a score of  $\geq 9$  used to define clinically significant depression status. From Waves 2-5, the Composite International Diagnostic Interview quantified diagnosis of a Major Depressive Episode during the past 12 months; Major Depression was classified as either a CES-D $\geq 9$  (at any Wave) and/or a diagnosis of Major Depressive Episode (Waves 2-5).

**eTable 1.** Adjusted Incident Rate Ratios For Associations Of All Included Variables With Depressive Symptoms And Adjusted Odds Ratios For Associations With Major Depression Status

| Variables                             | Depressive symptoms |                  |                  | Major Depression status |                  |                  |
|---------------------------------------|---------------------|------------------|------------------|-------------------------|------------------|------------------|
|                                       | Continuous model    | IRR (95% CI)     |                  | OR (95% CI)             |                  |                  |
|                                       |                     | 3 dose PA model  | 5 dose PA model  | Continuous model        | 3 dose PA model  | 5 dose PA model  |
| Age, y                                | 1.00 (1.00-1.00)    | 1.00 (1.00-1.00) | 1.00 (1.00-1.00) | 0.98 (0.96-0.99)        | 0.97 (0.96-0.99) | 0.97 (0.96-0.98) |
| Sex <sup>a</sup>                      |                     |                  |                  |                         |                  |                  |
| Female                                | 1.31 (1.24-1.39)    | 1.31 (1.24-1.39) | 1.30 (1.23-1.38) | 1.90 (1.57-2.30)        | 1.87 (1.55-2.26) | 1.85 (1.53-2.24) |
| Education level <sup>a</sup>          |                     |                  |                  |                         |                  |                  |
| Secondary                             | 0.88 (0.81-0.94)    | 0.88 (0.82-0.95) | 0.88 (0.82-0.95) | 0.73 (0.57-0.93)        | 0.74 (0.58-0.94) | 0.74 (0.58-0.94) |
| Tertiary                              | 0.86 (0.80-0.92)    | 0.87 (0.81-0.94) | 0.87 (0.81-0.94) | 0.59 (0.46-0.75)        | 0.61 (0.47-0.78) | 0.61 (0.48-0.78) |
| Lifestyle factors <sup>a</sup>        |                     |                  |                  |                         |                  |                  |
| Current smoker                        | 1.12 (1.04-1.20)    | 1.11 (1.04-1.19) | 1.11 (1.04-1.19) | 1.97 (1.56-2.50)        | 1.97 (1.56-2.49) | 1.96 (1.55-2.48) |
| Alcohol issue                         | 1.19 (1.13-1.26)    | 1.19 (1.13-1.26) | 1.20 (1.13-1.27) | 1.40 (1.12-1.74)        | 1.41 (1.13-1.76) | 1.41 (1.13-1.76) |
| Anti-depressant use                   | 1.34 (1.25-1.43)    | 1.34 (1.26-1.43) | 1.34 (1.26-1.43) | 5.38 (4.31-6.73)        | 5.37 (4.30-6.71) | 5.36 (4.29-6.70) |
| Time period <sup>a</sup>              |                     |                  |                  |                         |                  |                  |
| Wave 2                                | 0.92 (0.88-0.96)    | 0.92 (0.88-0.96) | 0.92 (0.88-0.97) | 1.45 (1.19-1.77)        | 1.48 (1.21-1.80) | 1.49 (1.22-1.81) |
| Wave 3                                | 1.15 (1.09-1.20)    | 1.14 (1.09-1.19) | 1.14 (1.09-1.19) | 1.75 (1.43-2.13)        | 1.72 (1.41-2.11) | 1.72 (1.41-2.11) |
| Wave 4                                | 1.15 (1.09-1.20)    | 1.14 (1.09-1.19) | 1.14 (1.09-1.20) | 1.81 (1.47-2.23)        | 1.80 (1.47-2.22) | 1.81 (1.47-2.23) |
| Wave 5                                | 1.19 (1.13-1.25)    | 1.18 (1.12-1.24) | 1.18 (1.12-1.24) | 2.03 (1.63-2.53)        | 2.03 (1.63-2.52) | 2.03 (1.63-2.53) |
| PA dose (MET.min.week <sup>-1</sup> ) |                     |                  |                  |                         |                  |                  |
| Continuous, min/wk                    | 1.00 (1.00-1.00)    | -                | -                | 1.00 (1.00-1.00)        | -                | -                |
| 3 dose PA                             |                     |                  |                  |                         |                  |                  |
| Low PA                                | -                   | [Reference]      | -                | -                       | [Reference]      | -                |
| Moderate PA                           | -                   | 0.95 (0.90-1.00) | -                | -                       | 0.58 (0.45-0.75) | -                |
| High PA                               | -                   | 0.81 (0.78-0.84) | -                | -                       | 0.56 (0.48-0.65) | -                |
| 5 dose PA                             |                     |                  |                  |                         |                  |                  |
| 0                                     | -                   | -                | [Reference]      | -                       | -                | [Reference]      |
| 1-<600                                | -                   | -                | 0.94 (0.89-0.99) | -                       | -                | 0.86 (0.69-1.06) |
| 600-<1,200                            | -                   | -                | 0.93 (0.88-0.99) | -                       | -                | 0.56 (0.43-0.73) |
| 1200-<2400                            | -                   | -                | 0.84 (0.80-0.89) | -                       | -                | 0.59 (0.47-0.74) |



**eTable 2.** Adjusted Incident Rate Ratios For Associations Of All Included Variables With Depressive Symptoms In Those With And Without Chronic Disease

| Variables                             | With chronic Disease (MET.min.week <sup>-1</sup> ) IRR (95% CI) |                   |                  | Without chronic Disease (MET.min.week <sup>-1</sup> ) IRR (95% CI) |                  |                  |
|---------------------------------------|-----------------------------------------------------------------|-------------------|------------------|--------------------------------------------------------------------|------------------|------------------|
|                                       | Continuous model                                                | 3 dose PA model   | 5 dose PA model  | Continuous model                                                   | 3 dose PA model  | 5 dose PA model  |
| Age, y                                | 1.00 (0.99-1.00)                                                | 1.00 (0.99-1.00)  | 1.00 (0.99-1.00) | 0.99 (0.98-1.00)                                                   | 0.99 (0.99-1.00) | 0.99 (0.98-1.00) |
| Sex*                                  |                                                                 |                   |                  |                                                                    |                  |                  |
| Female                                | 1.29 (1.22-1.37)                                                | 1.29 (1.22-1.37)  | 1.29 (1.21-1.36) | 1.25 (1.11-1.41)                                                   | 1.26 (1.12-1.43) | 1.26 (1.11-1.42) |
| Education level*                      |                                                                 |                   |                  |                                                                    |                  |                  |
| Secondary                             | 0.89 (0.82-0.96)                                                | 0.89 (0.83-0.97)  | 0.90 (0.83-0.97) | 0.96 (0.80-1.15)                                                   | 0.97 (0.81-1.15) | 0.96 (0.80-1.14) |
| Tertiary                              | 0.84 (0.78-0.91)                                                | 0.86 (0.79-0.93)  | 0.86 (0.79-0.93) | 0.99 (0.83-1.19)                                                   | 1.00 (0.84-1.20) | 1.00 (0.83-1.19) |
| Lifestyle factors*                    |                                                                 |                   |                  |                                                                    |                  |                  |
| Current smoker                        | 1.14 (1.06-1.23)                                                | 1.14 (1.06-1.23)  | 1.14 (1.06-1.23) | 1.11 (0.95-1.29)                                                   | 1.10 (0.94-1.29) | 1.09 (0.93-1.27) |
| Alcohol issue                         | 1.19 (1.12-1.26)                                                | 1.19 (1.12-1.27)  | 1.19 (1.12-1.27) | 1.24 (1.08-1.43)                                                   | 1.25 (1.09-1.44) | 1.24 (1.08-1.43) |
| Anti-depressant use                   | 1.31 (1.23-1.40)                                                | 1.31 (1.23-1.40)  | 1.32 (1.23-1.41) | 1.76 (1.43-2.15)                                                   | 1.75 (1.43-2.15) | 1.75 (1.43-2.15) |
| Time period*                          |                                                                 |                   |                  |                                                                    |                  |                  |
| Wave 2                                | 0.92 (0.87-0.97)                                                | 0.92 (0.87-0.97)  | 0.92 (0.88-0.97) | 0.97 (0.87-0.97)                                                   | 0.96 (0.85-1.08) | 0.96 (0.86-1.08) |
| Wave 3                                | 1.17 (1.11-1.22)                                                | 1.16 (1.10-1.22)  | 1.16 (1.10-1.22) | 1.17 (1.11-1.22)                                                   | 1.14 (1.01-1.29) | 1.14 (1.01-1.29) |
| Wave 4                                | 1.16 (1.10-1.22)                                                | 1.15 (1.10-1.21)  | 1.16 (1.10-1.22) | 1.16 (1.10-1.22)                                                   | 1.16 (1.02-1.32) | 1.16 (1.02-1.33) |
| Wave 5                                | 1.21 (1.14-1.28)                                                | 1.20 (1.13-1.27)  | 1.20 (1.14-1.27) | 1.21 (1.14-1.28)                                                   | 1.21 (1.05-1.39) | 1.21 (1.05-1.40) |
| PA dose (MET.min.week <sup>-1</sup> ) |                                                                 |                   |                  |                                                                    |                  |                  |
| Continuous, min/wk                    | 1.00 (1.00-1.00)                                                | -                 | -                | 1.00 (1.00-1.00)                                                   | -                | -                |
| 3 dose PA                             |                                                                 |                   |                  |                                                                    |                  |                  |
| Low PA                                | -                                                               | [Reference]       | -                | -                                                                  | [Reference]      | -                |
| Moderate PA                           | -                                                               | 0.93 (0.88; 0.99) | -                | -                                                                  | 1.04 (0.89-1.21) | -                |
| High PA                               | -                                                               | 0.79 (0.76; 0.83) | -                | -                                                                  | 0.90 (0.82-0.99) | -                |
| 5 dose PA                             |                                                                 |                   |                  |                                                                    |                  |                  |
| 0                                     | -                                                               | -                 | [Reference]      | -                                                                  | -                | [Reference]      |
| 1-<600                                | -                                                               | -                 | 0.95 (0.90-1.01) | -                                                                  | -                | 0.86 (0.74-0.99) |
| 600-<1,200                            | -                                                               | -                 | 0.92 (0.87-0.98) | -                                                                  | -                | 1.00 (0.85-1.16) |
| 1200-<2400                            | -                                                               | -                 | 0.82 (0.78-0.87) | -                                                                  | -                | 0.99 (0.87-1.13) |
| ≥2,400                                | -                                                               | -                 | 0.77 (0.73-0.80) | -                                                                  | -                | 0.80 (0.72-0.90) |

Abbreviations: PA, physical activity; IRR, incidence rate ratio; CI, confidence interval.

\*Reference categories: age [continuous], sex [reference, male], wave [reference, baseline], education [reference, primary], smoking status [reference, non-smoker], alcohol issue [reference, none], anti-depressant medication use [reference, non-user].

**eTable 3.** Adjusted Odd Ratios For All Included Variables With Major Depression Status In Those With And Without Chronic Disease

| Variables                             | OR (95% CI)      |                  |                  | OR (95% CI)       |                   |                   |
|---------------------------------------|------------------|------------------|------------------|-------------------|-------------------|-------------------|
|                                       | Continuous model | 3 dose PA model  | 5 dose PA model  | Continuous model  | 3 dose PA model   | 5 dose PA model   |
| Age, y                                | 0.97 (0.96-0.98) | 0.97 (0.96-0.98) | 0.97 (0.96-0.98) | 0.94 (0.91-0.97)  | 0.94 (0.91-0.97)  | 0.94 (0.91-0.97)  |
| Sex*                                  |                  |                  |                  |                   |                   |                   |
| Female                                | 1.78 (1.45-2.18) | 1.76 (1.44-2.15) | 1.74 (1.43-2.13) | 1.93 (1.24-3.00)  | 1.83 (1.17-2.84)  | 1.83 (1.18-2.85)  |
| Education level*                      |                  |                  |                  |                   |                   |                   |
| Secondary                             | 0.72 (0.56-0.93) | 0.73 (0.57-0.94) | 0.74 (0.57-0.95) | 1.11 (0.57-2.16)  | 1.08 (0.56-2.09)  | 1.08 (0.56-2.09)  |
| Tertiary                              | 0.60 (0.46-0.78) | 0.62 (0.48-0.81) | 0.62 (0.48-0.81) | 0.71 (0.36-1.42)  | 0.71 (0.36-1.42)  | 0.71 (0.36-1.43)  |
| Lifestyle factors*                    |                  |                  |                  |                   |                   |                   |
| Current smoker                        | 2.12 (1.64-2.73) | 2.12 (1.64-2.73) | 2.11 (1.63-2.72) | 1.46 (0.85-2.51)  | 1.43 (0.83-2.46)  | 1.43 (0.83-2.47)  |
| Alcohol issue                         | 1.26 (1.00-1.60) | 1.27 (1.00-1.62) | 1.28 (1.01-1.62) | 2.19 (1.31-3.66)  | 2.22 (1.32-3.71)  | 2.22 (1.32-3.72)  |
| Anti-depressant use                   | 5.12 (4.05-6.48) | 5.11 (4.04-6.45) | 5.10 (4.03-6.45) | 9.34 (4.74-18.40) | 9.37 (4.76-18.43) | 9.37 (4.76-18.45) |
| Time period*                          |                  |                  |                  |                   |                   |                   |
| Wave 2                                | 1.43 (1.15-1.77) | 1.45 (1.17-1.80) | 1.46 (1.17-1.81) | 1.92 (1.12-3.28)  | 1.97 (1.15-3.38)  | 1.97 (1.14-3.38)  |
| Wave 3                                | 1.75 (1.41-2.17) | 1.72 (1.39-2.14) | 1.72 (1.39-2.14) | 2.37 (1.34-4.17)  | 2.35 (1.33-4.15)  | 2.35 (1.33-4.15)  |
| Wave 4                                | 1.82 (1.46-2.28) | 1.80 (1.44-2.25) | 1.81 (1.45-2.26) | 2.41 (1.30-4.46)  | 2.46 (1.32-4.56)  | 2.46 (1.32-4.57)  |
| Wave 5                                | 2.02 (1.59-2.55) | 2.01 (1.58-2.54) | 2.01 (1.59-2.55) | 3.16 (1.63-6.11)  | 3.22 (1.66-6.24)  | 3.22 (1.66-6.24)  |
| PA dose (MET.min.week <sup>-1</sup> ) |                  |                  |                  |                   |                   |                   |
| Continuous, min/wk                    | 1.00 (1.00-1.00) | -                | -                | 1.00 (1.00-1.00)  | -                 | -                 |
| 3 dose PA                             |                  |                  |                  |                   |                   |                   |
| Low PA                                | -                | [Reference]      | -                | -                 | [Reference]       | -                 |
| Moderate PA                           | -                | 0.57 (0.43-0.75) | -                | -                 | 0.62 (0.31-1.24)  | -                 |
| High PA                               | -                | 0.57 (0.49-0.68) | -                | -                 | 0.57 (0.49-0.68)  | -                 |
| 5 dose PA                             |                  |                  |                  |                   |                   |                   |
| 0                                     | -                | -                | [Reference]      | -                 | -                 | [Reference]       |
| 1-<600                                | -                | -                | 0.84 (0.67-1.06) | -                 | -                 | 1.00 (0.56-1.80)  |
| 600-<1,200                            | -                | -                | 0.55 (0.42-0.73) | -                 | -                 | 0.62 (0.30-1.26)  |
| 1200-<2400                            | -                | -                | 0.62 (0.49-0.80) | -                 | -                 | 0.54 (0.29-1.00)  |
| ≥2,400                                | -                | -                | 0.52 (0.43-0.63) | -                 | -                 | 0.57 (0.36-0.91)  |

Abbreviations: PA, physical activity; OR, odds ratio; CI, confidence interval.

\*Reference categories: age [continuous], sex [reference, male], wave [reference, baseline], education [reference, primary], smoking status [reference, non-smoker], alcohol issue [reference, none], anti-depressant medication use [reference, non-user]
