# Supplementary material for: Physical Activity Dose and Depression in a Cohort of Older Adults in The Irish Longitudinal Study on Ageing
Source: PubMed Central journal article supplement (PMC10334250; doi:10.1001/jamanetworkopen.2023.22489), 2023-07-10
Supplement: jamanetwopen-e2322489-s002.pdf [file jamanetwopen-e2322489-s002.pdf]

## Data Sharing Statement

Laird. Physical Activity Dose and Depression in a Cohort of Older Adults in The Irish Longitudinal Study on Ageing. *JAMA Netw Open*. Published July 10, 2023.  
doi:10.1001/jamanetworkopen.2023.22489

### Data

**Data available:** No

### Additional Information

**Explanation for why data not available:** Code for the analysis will ne made available. The actual data is protected and researchers can apply for access
